# Supplementary material for: Nitrates as a Potential N Supply for Microbial Ecosystems in a Hyperarid Mars Analog System
Source: PubMed Central journal article supplement (PMC6958444; doi:10.3390/life9040079), 2019-10-19
Supplement: life-09-00079-s001.pdf [file life-09-00079-s001.pdf]

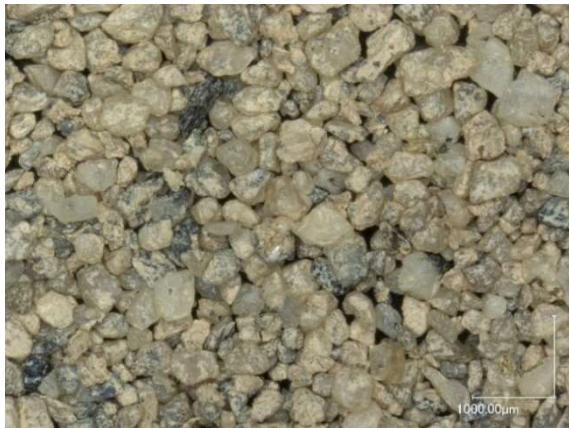

(a)

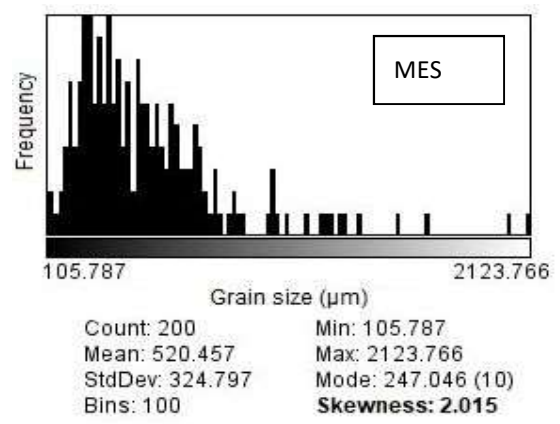

(b)

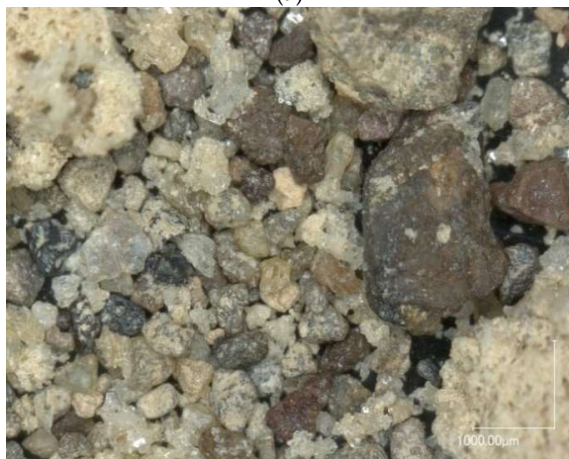

(c)

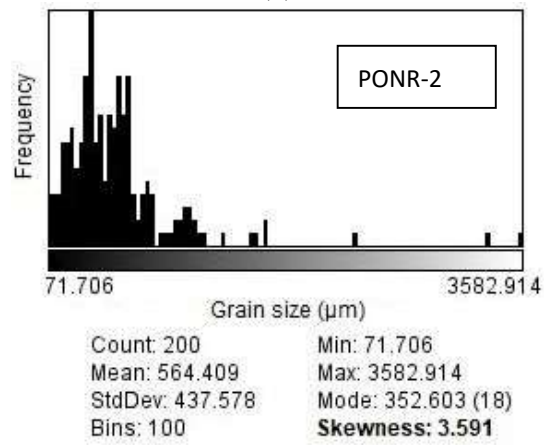

(d)

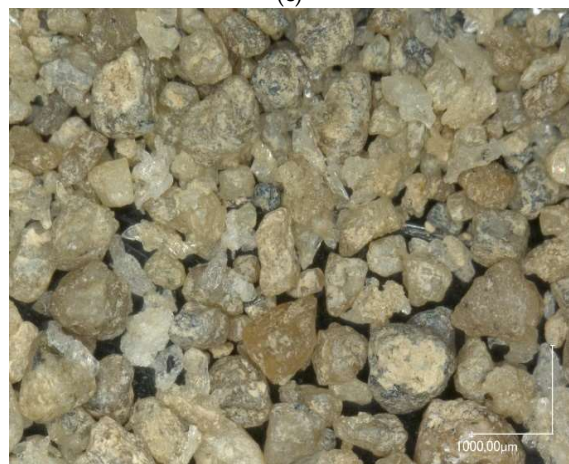

(e)

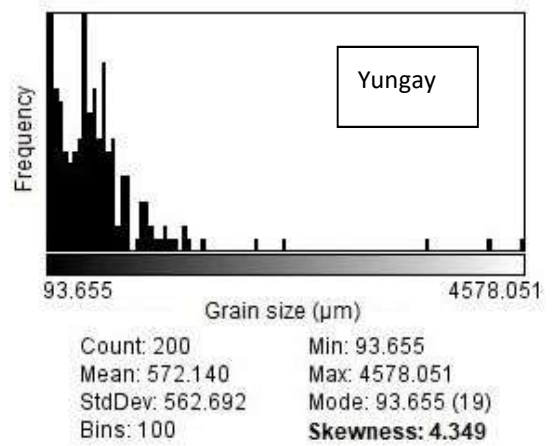

(f)

Figure S1. Cont.

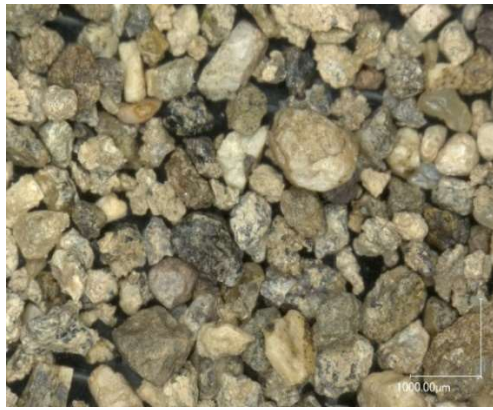

(g)

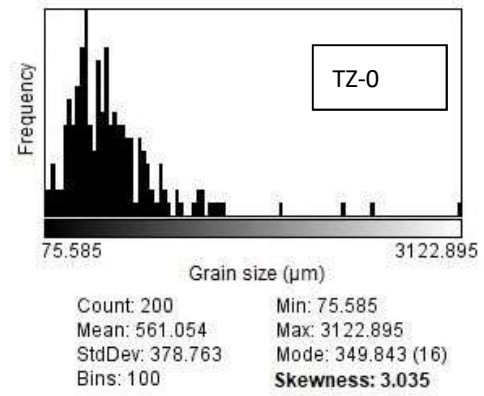

(h)

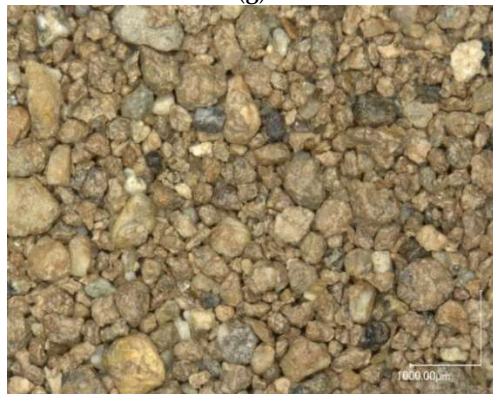

(i)

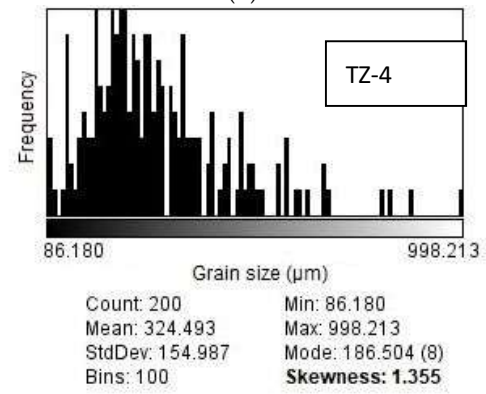

(j)

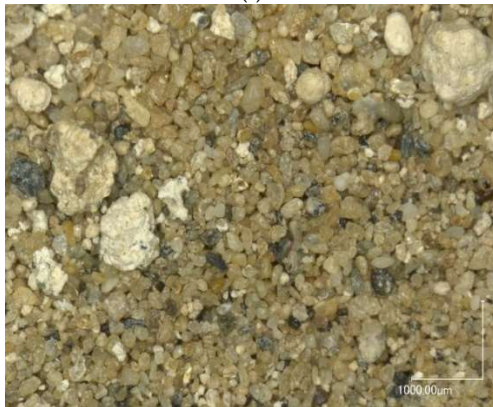

(k)

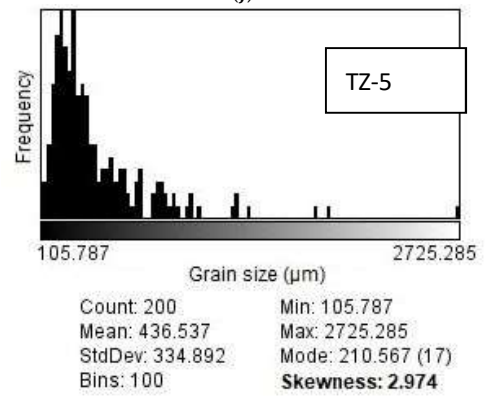

(l)

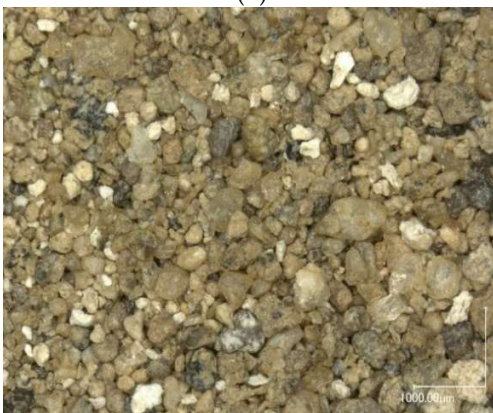

(m)

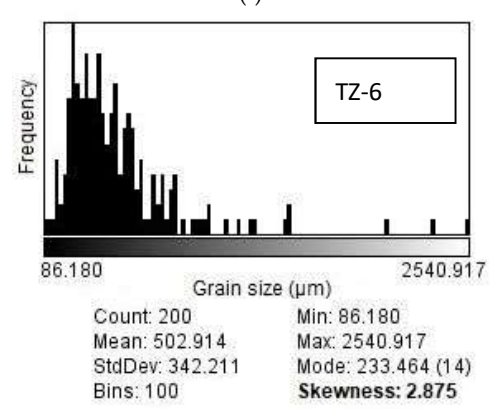

(n)

**Figure S1.** Microscopic visualization and grain size distribution of (a,b) MES, (c,d) PONR-2, (e,f) Yungay, (g,h) TZ-0, (i,j) TZ-4, (k,l) TZ-5, and (m,n) TZ-6.

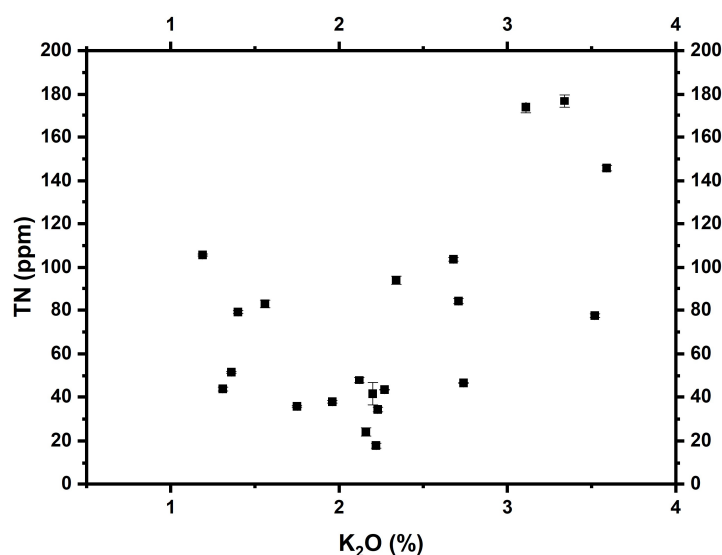

**Figure S2.** Scatter plot of TN and potassium. Errors on K<sub>2</sub>O measurements were smaller than the symbols.

**Table S1.** Detailed major element components of sampling pits. The standard deviation of each measured major sedimentary elements is between 0.01% and 0.05% based on precision analyses of XRF standards (LOI, loss on ignition).

| Pit Name | SiO <sub>2</sub> % | TiO <sub>2</sub> % | Al <sub>2</sub> O <sub>3</sub> % | Fe <sub>2</sub> O <sub>3</sub> % | MnO % | MgO % | CaO % | Na <sub>2</sub> O % | K <sub>2</sub> O % | P <sub>2</sub> O <sub>5</sub> % | LOI % | Cl %  |
|----------|--------------------|--------------------|----------------------------------|----------------------------------|-------|-------|-------|---------------------|--------------------|---------------------------------|-------|-------|
| M1       | 69.05              | 0.39               | 14.84                            | 2.92                             | 0.05  | 1.27  | 3.31  | 4.19                | 2.22               | 0.13                            | 1.43  | 0.011 |
| M2       | 62.48              | 0.68               | 14.95                            | 5.29                             | 0.09  | 2.22  | 4.56  | 3.55                | 2.12               | 0.16                            | 3.49  | 0.008 |
| M3       | 67.94              | 0.36               | 14.81                            | 2.81                             | 0.05  | 1.34  | 3.79  | 3.94                | 2.16               | 0.12                            | 2.38  | 0.010 |
| P1       | 64.05              | 0.74               | 15.23                            | 4.44                             | 0.08  | 1.27  | 3.80  | 2.93                | 2.74               | 0.26                            | 3.86  | 0.009 |
| P2       | 51.48              | 0.60               | 13.37                            | 4.26                             | 0.07  | 1.65  | 8.57  | 2.41                | 2.34               | 0.20                            | 13.11 | 0.005 |
| P3       | 33.78              | 0.52               | 8.80                             | 3.29                             | 0.06  | 1.03  | 16.91 | 1.69                | 1.31               | 0.11                            | 17.36 | 0.006 |
| Y1       | 47.01              | 0.67               | 12.14                            | 3.68                             | 0.06  | 1.21  | 11.83 | 3.31                | 2.27               | 0.08                            | 10.41 | 0.008 |
| Y2       | 47.88              | 0.48               | 12.08                            | 2.88                             | 0.06  | 1.09  | 11.24 | 2.90                | 2.23               | 0.09                            | 14.65 | 0.007 |
| Y3       | 52.45              | 0.78               | 12.93                            | 4.23                             | 0.07  | 0.99  | 9.57  | 3.48                | 2.20               | 0.11                            | 7.96  | 0.009 |
| T01      | 53.32              | 0.98               | 13.62                            | 6.63                             | 0.24  | 3.43  | 6.72  | 3.29                | 1.96               | 0.23                            | 9.34  | 0.007 |
| T02      | 49.66              | 0.79               | 12.02                            | 8.17                             | 0.23  | 4.81  | 7.99  | 3.05                | 1.36               | 0.18                            | 11.52 | 0.007 |
| T03      | 53.48              | 0.78               | 14.20                            | 6.75                             | 0.23  | 3.71  | 6.29  | 3.79                | 1.75               | 0.17                            | 8.59  | 0.008 |
| T41      | 57.88              | 0.65               | 15.40                            | 5.39                             | 0.13  | 2.78  | 3.54  | 2.54                | 2.71               | 0.38                            | 8.38  | 0.005 |
| T42      | 53.33              | 0.58               | 15.02                            | 5.18                             | 0.14  | 3.21  | 5.28  | 2.09                | 2.68               | 0.44                            | 11.80 | 0.006 |
| T43      | 54.01              | 0.71               | 14.76                            | 6.60                             | 0.15  | 3.30  | 4.05  | 3.01                | 3.52               | 0.35                            | 9.20  | 0.005 |
| T51      | 55.99              | 0.55               | 12.47                            | 5.49                             | 0.08  | 1.92  | 10.92 | 3.46                | 1.56               | 0.34                            | 6.93  | 0.013 |
| T52      | 55.79              | 0.63               | 12.57                            | 5.84                             | 0.09  | 2.06  | 9.67  | 3.96                | 1.40               | 0.36                            | 7.37  | 0.024 |
| T53      | 44.37              | 0.49               | 9.92                             | 5.21                             | 0.07  | 2.70  | 17.26 | 3.03                | 1.19               | 0.37                            | 14.75 | 0.018 |
| T61      | 57.35              | 0.86               | 13.56                            | 9.47                             | 0.17  | 2.86  | 3.34  | 3.12                | 3.59               | 0.22                            | 5.17  | 0.010 |
| T62      | 50.10              | 0.71               | 11.50                            | 8.02                             | 0.13  | 2.52  | 9.38  | 3.66                | 3.34               | 0.14                            | 10.18 | 0.014 |
| T63      | 52.25              | 0.76               | 12.09                            | 7.70                             | 0.13  | 2.62  | 8.48  | 2.70                | 3.11               | 0.20                            | 9.65  | 0.017 |
